# Supplementary material for: Probabilistic solvers enable a straight-forward exploration of numerical uncertainty in neuroscience models
Source: Springer Nature journal article supplement (doi:10.1007/s10827-022-00827-7), 2022-08-06
Supplement: 10827_2022_827_MOESM1_ESM.pdf [file 10827_2022_827_MOESM1_ESM.pdf]

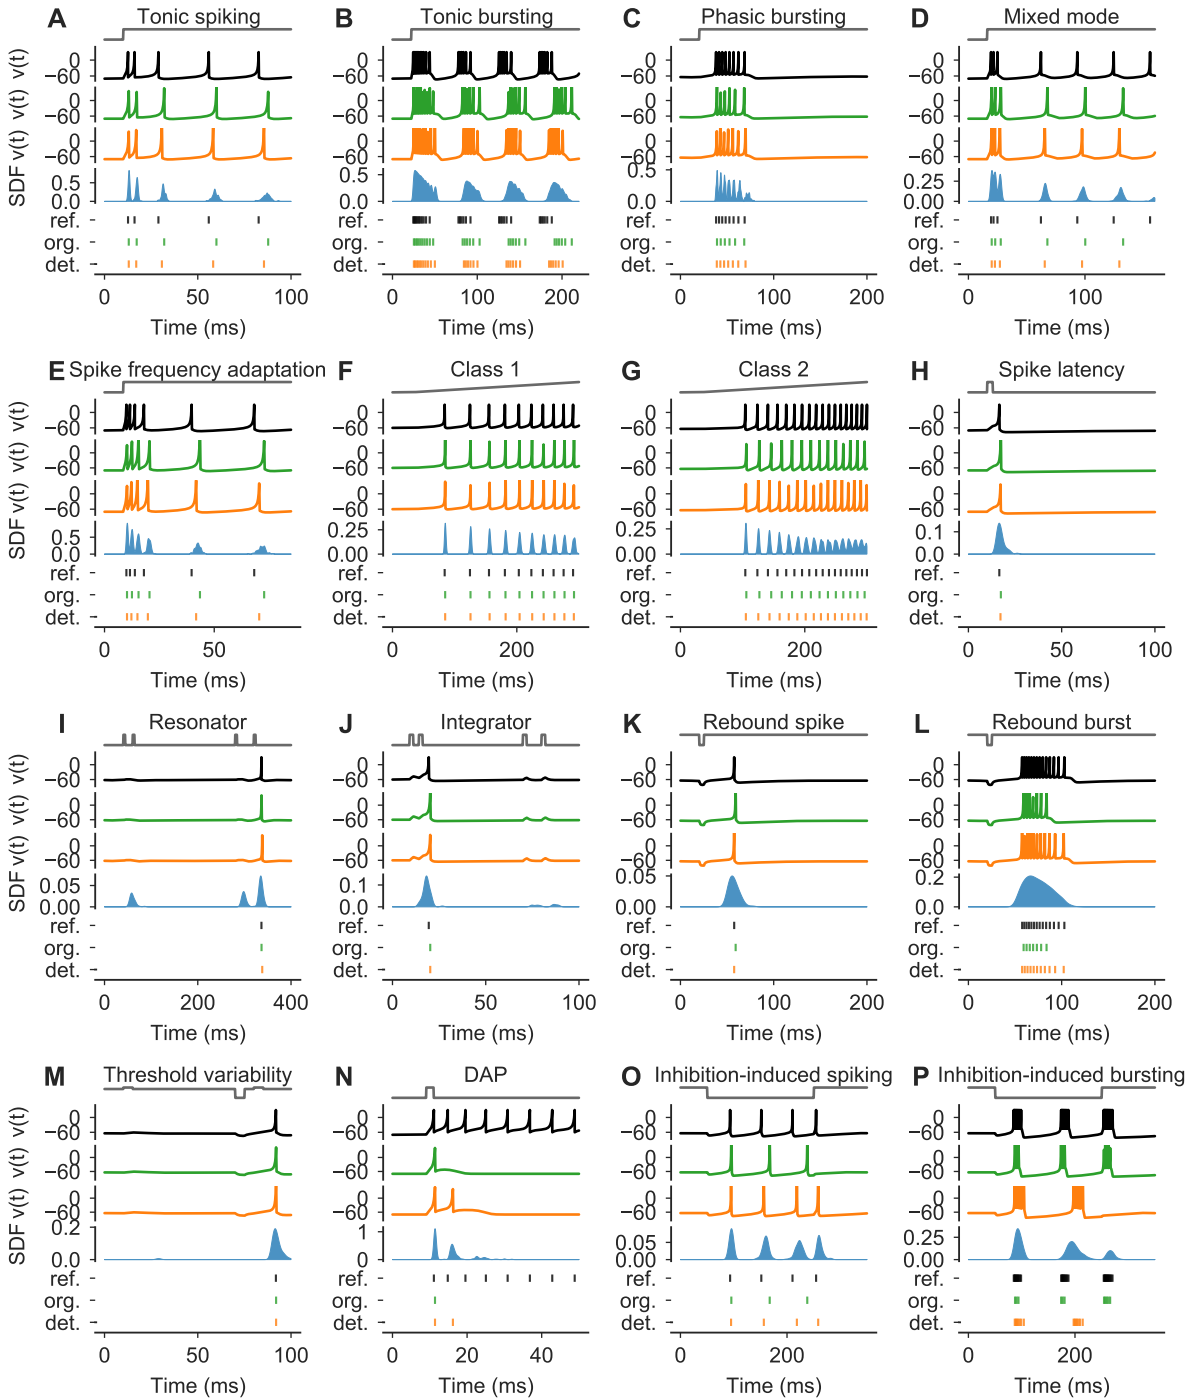

**Fig. S1:** (A-P) As in Figs. 2B and 2C: Simulations of the IN model for different parametrizations  $\theta_i$  with stimuli  $I_{\text{Stim}}$  (normalized in gray). Solutions for  $v(t)$  are shown for a reference solver (black), the original solver scheme (green) and a deterministic FE solver (orange). A SDF is shown for a  $\text{FE}_{\frac{1}{2}}$  solver. For plotting,  $v(t)$  were clipped at 30. In every panel, spike-times are shown in a raster plot for all deterministic solvers (bottom).
