# Supplementary material for: Probabilistic solvers enable a straight-forward exploration of numerical uncertainty in neuroscience models
Source: Springer Nature journal article supplement (doi:10.1007/s10827-022-00827-7), 2022-08-06
Supplement: 10827_2022_827_MOESM2_ESM.pdf [file 10827_2022_827_MOESM2_ESM.pdf]

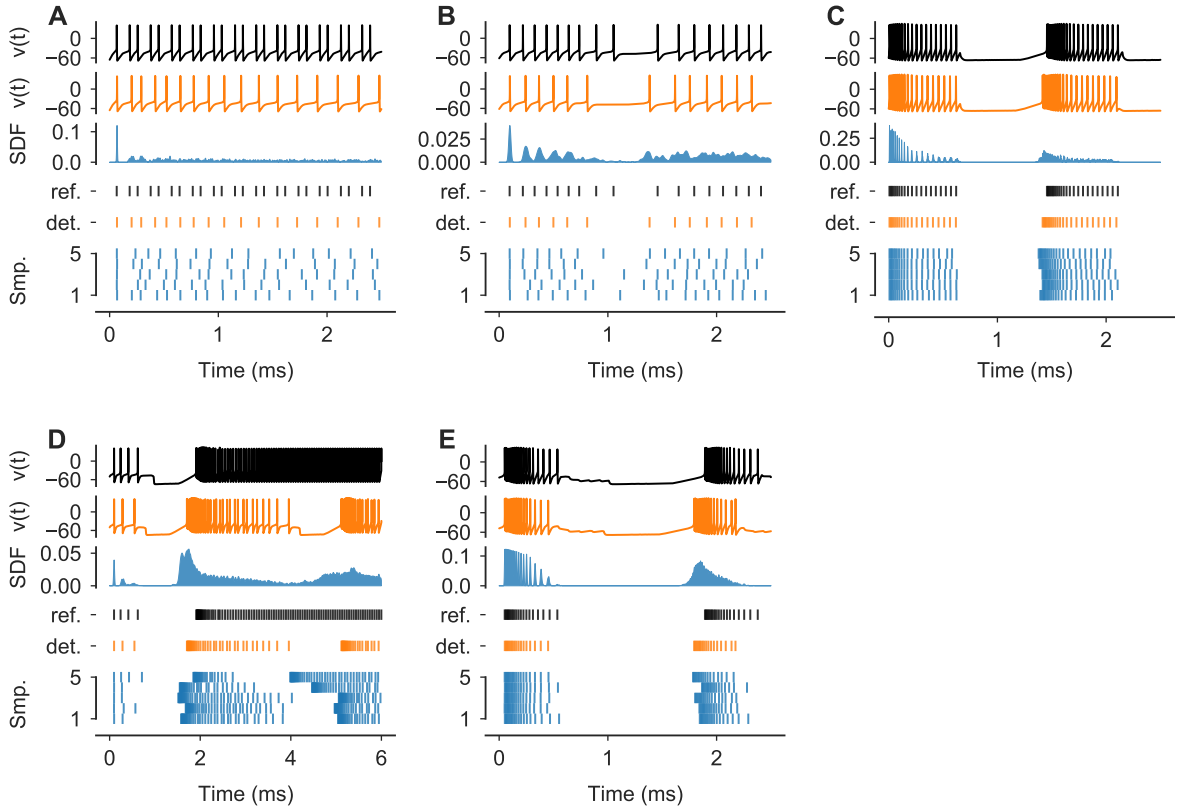

**Fig. S2:** (A-E) As in Figs. 2D and 2E: Simulations of the STG model for all five synaptic parametrizations (see Section C) from  $\theta_{\text{syn}}^a$  to  $\theta_{\text{syn}}^e$ , respectively. Solutions for the membrane potential  $v(t)$  of the LP neuron are shown for a reference solver (black) and a deterministic EE solver with  $\Delta t = 0.1$  ms (orange). A SDF is shown for a  $\text{EE}_f^\ddagger$  solver using the same step-size. *Bottom panels:* Spike-times of the LP neuron are shown for the reference (black), the deterministic EE solution (orange) and for 5 samples from the probabilistic solver (blue).
