# Supplementary material for: Probabilistic solvers enable a straight-forward exploration of numerical uncertainty in neuroscience models
Source: Springer Nature journal article supplement (doi:10.1007/s10827-022-00827-7), 2022-08-06
Supplement: 10827_2022_827_MOESM3_ESM.pdf [file 10827_2022_827_MOESM3_ESM.pdf]

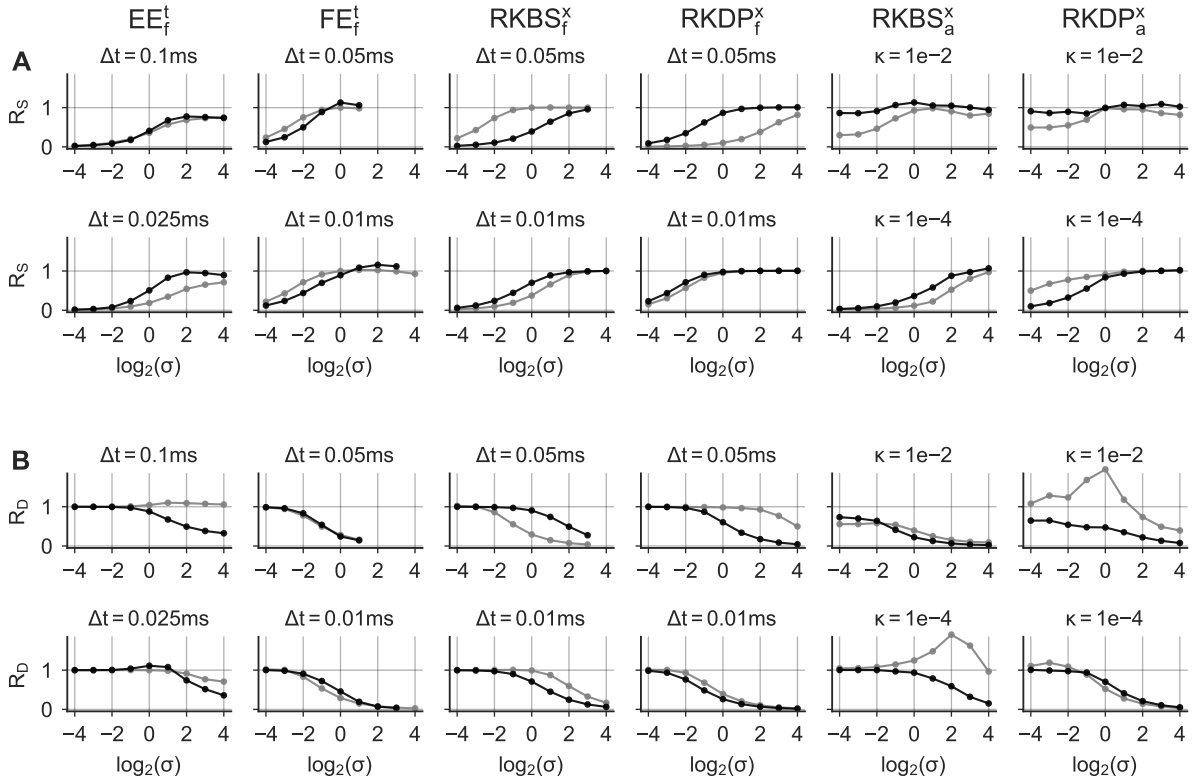

**Fig. S3:** (A, B) MAE ratios  $R_S$  and  $R_D$  for different solvers (column titles) and step-sizes  $\Delta t$  / tolerances  $\kappa$  (panel titles) for the step (grey) and the noisy step (black) stimulus as a function of the perturbation parameter  $\sigma$  (x-axis), respectively. See also Fig. 6D.
